# Supplementary material for: Enhanced Gas Sensing Performance of CuO-ZnO Composite Nanostructures for Low-Concentration NO2 Detection
Source: MDPI journal article supplement (doi:10.3390/chemosensors12040054), 2024-04-05
Supplement: s1 [file s1]

# Enhanced Gas Sensing Performance of CuO-ZnO Composite Nanostructures for Low-Concentration NO<sub>2</sub> Detection

Hakimeh Pakdel, Matteo Borsi, Massimo Ponzoni and Elisabetta Comini \*

Sensor Laboratory, Department of Information Engineering, University of Brescia, Via Valotti 9, 25133 Brescia, Italy; h.pakdel@unibs.it (H.P.); matteo.borsi@unibs.it (M.B.); massimo.ponzoni@unibs.it (M.P.)

\* Correspondence: elisabetta.comini@unibs.it

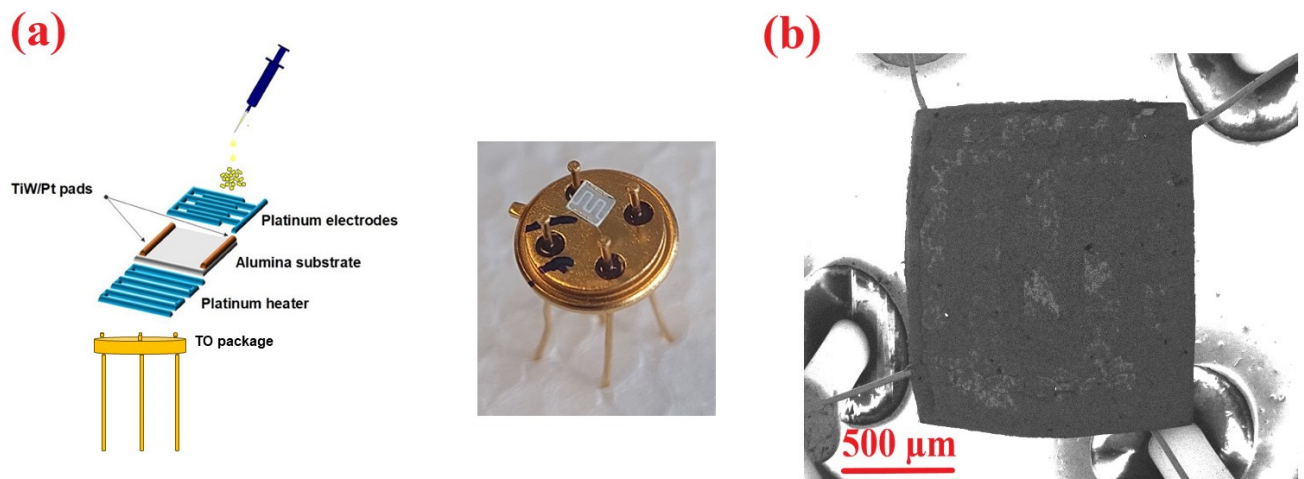

**Figure S1.** (a) Schematic representation of fabrication of the gas sensor for electrical measurements; (b) SEM image of gas sensing material drop-cast on Pt interdigitated deposited on the Al<sub>2</sub>O<sub>3</sub> substrate.

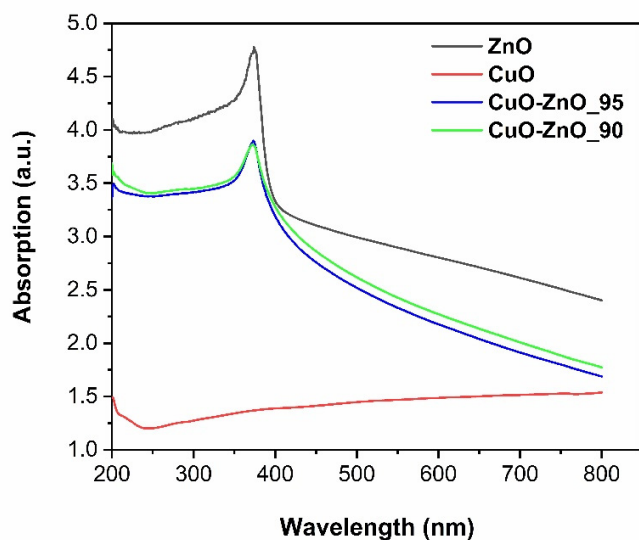

Figure S2. UV-vis absorbance spectra.

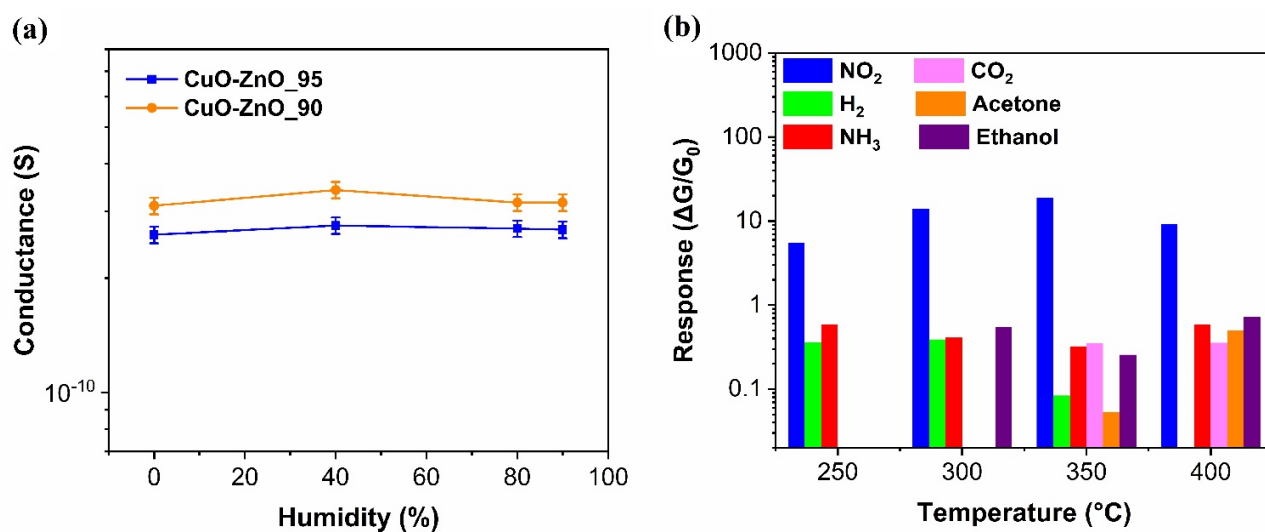

Figure S3. a) Conductance of CuO-ZnO<sub>95</sub> and CuO-ZnO<sub>90</sub> at different relative humidity (0-90%); b) Response of CuO-ZnO<sub>90</sub> toward 1 ppm of NO<sub>2</sub>, 100 ppm of H<sub>2</sub>, 25 ppm of NH<sub>3</sub>, 400 ppm of CO<sub>2</sub>, 10 ppm of acetone and 25 ppm of ethanol.

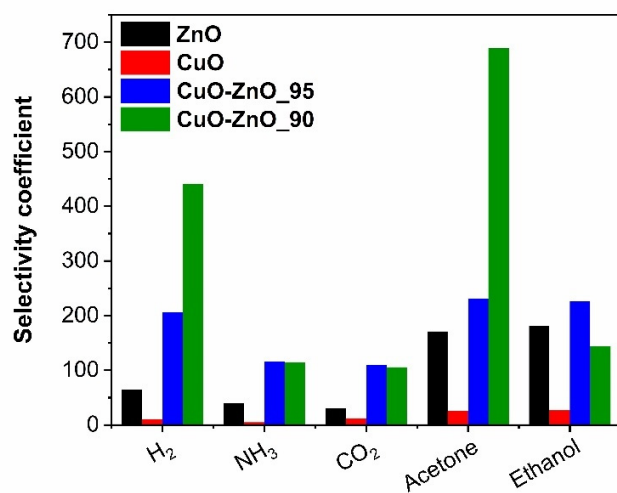

**Figure S4** Selectivity coefficient of ZnO, CuO, CuO-ZnO<sub>95</sub> and CuO-ZnO<sub>90</sub> to 5 ppm of NO<sub>2</sub>.

**Table S1** Response of CuO-ZnO<sub>95</sub> and CuO-ZnO<sub>90</sub> toward various concentration of NO<sub>2</sub> at 350 °C.

| Concentration | Response of CuO-ZnO <sub>95</sub> | Response of CuO-ZnO <sub>90</sub> |
|---------------|-----------------------------------|-----------------------------------|
| 0.1           | 1.6                               | 1.2                               |
| 0.2           | 3.3                               | 2.8                               |
| 0.5           | 5.7                               | 4.9                               |
| 1             | 18.3                              | 18.9                              |
| 2             | 25.3                              | 26.7                              |
| 5             | 36.1                              | 37                                |
